# Supplementary material
Source: PubMed Central journal article supplement (PMC3055244)

Supplementary Figure 1: Scattergram showing the correlation between corrected hippocampus volume z scores and IQ for the 7 subjects with CLS ( $r = -.64$ ,  $p = .06$ )

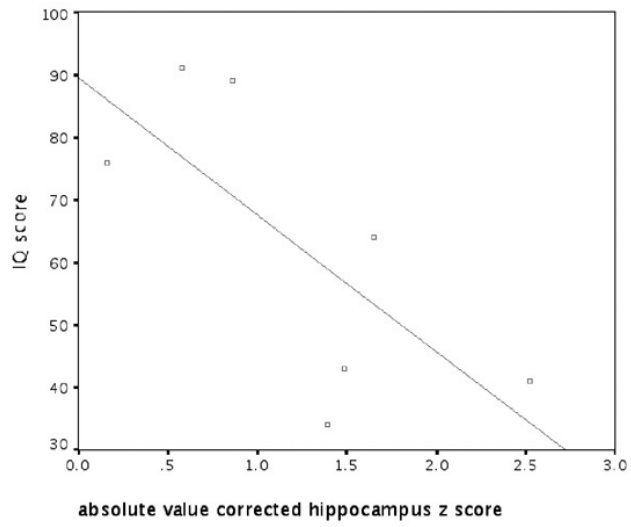

Supplement: NIHMS275344-supplement-Supplementary_Figure_1.pdf [file NIHMS275344-supplement-Supplementary_Figure_1.pdf]
